# Supplementary material
Source: Springer Nature journal article supplement (https://www.springermedizin.de/resource/supplementary/13054_2014_2580_MOESM8_ESM.pdf/9714320)

**Before lavage**

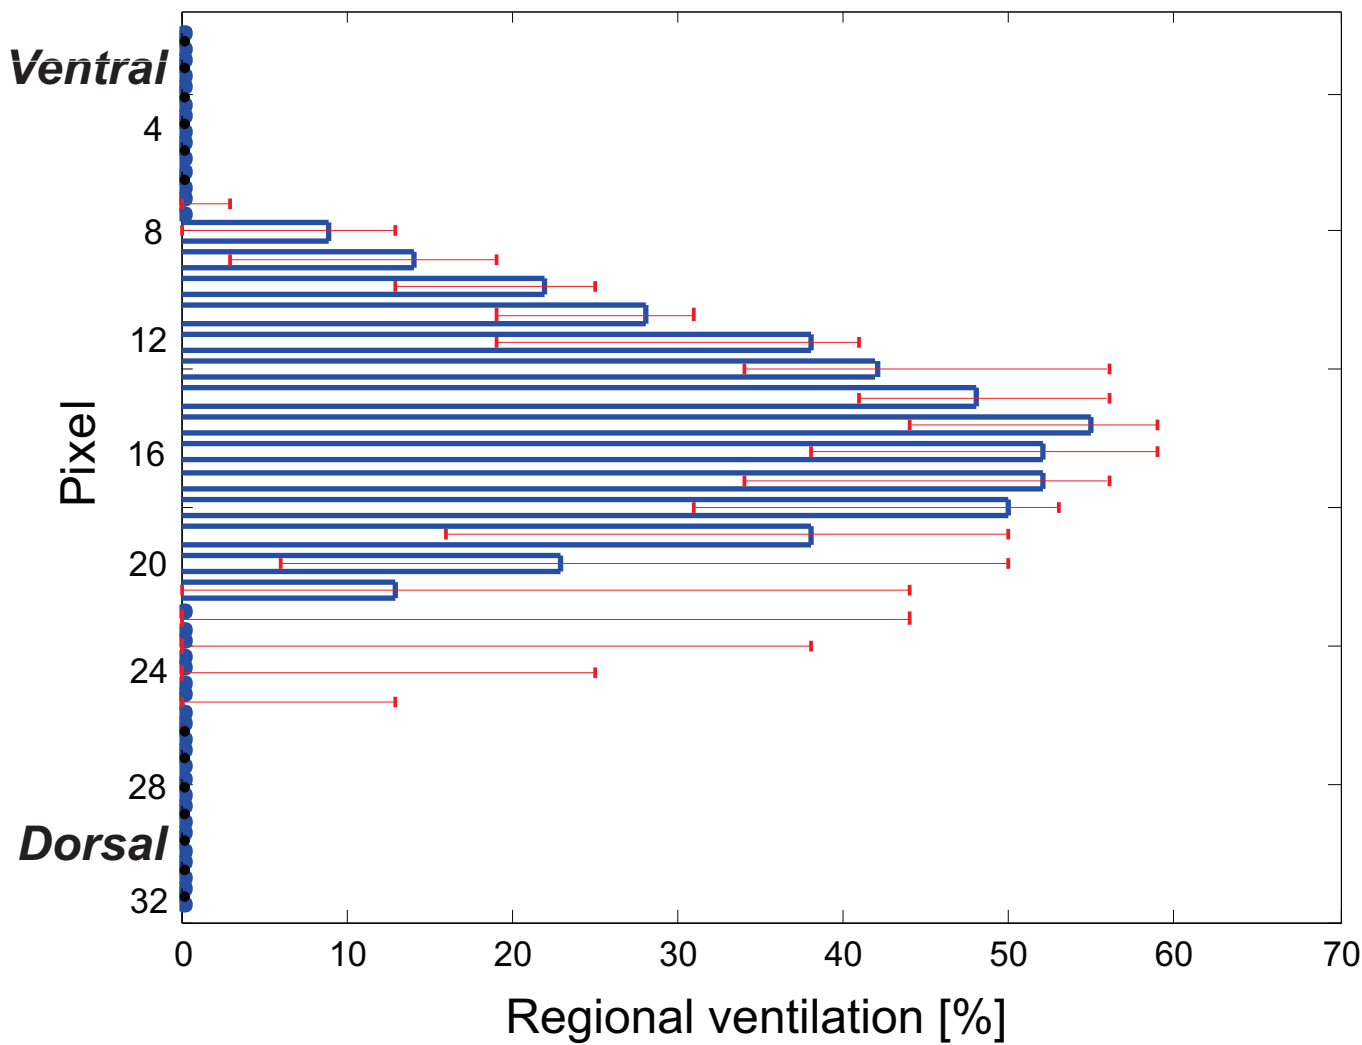

**After Lavage**

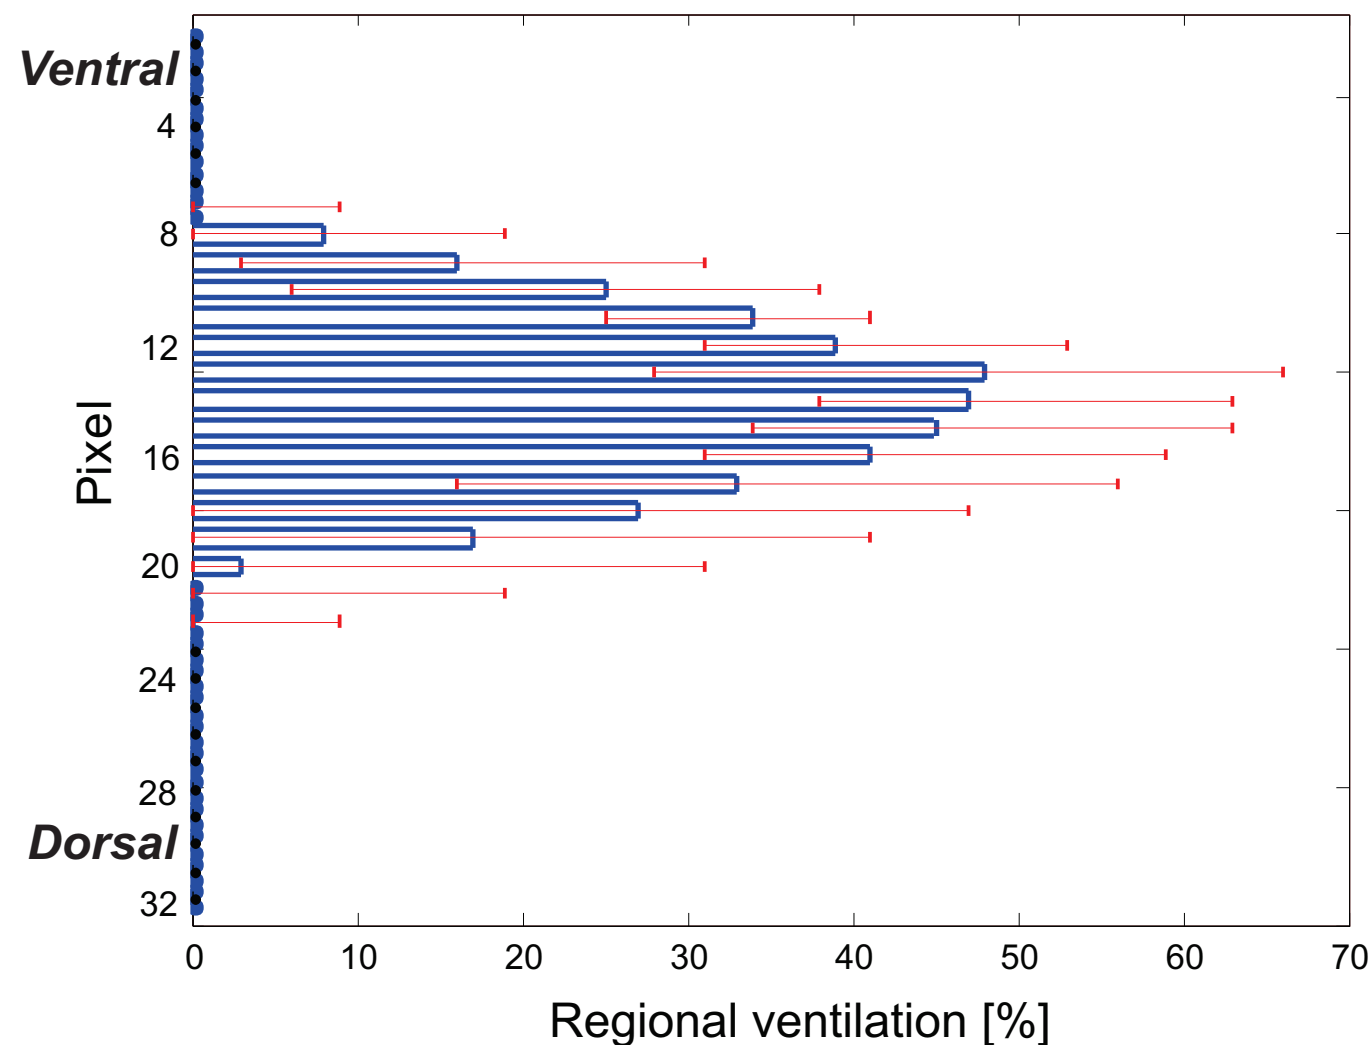

**2-hour ventilation**

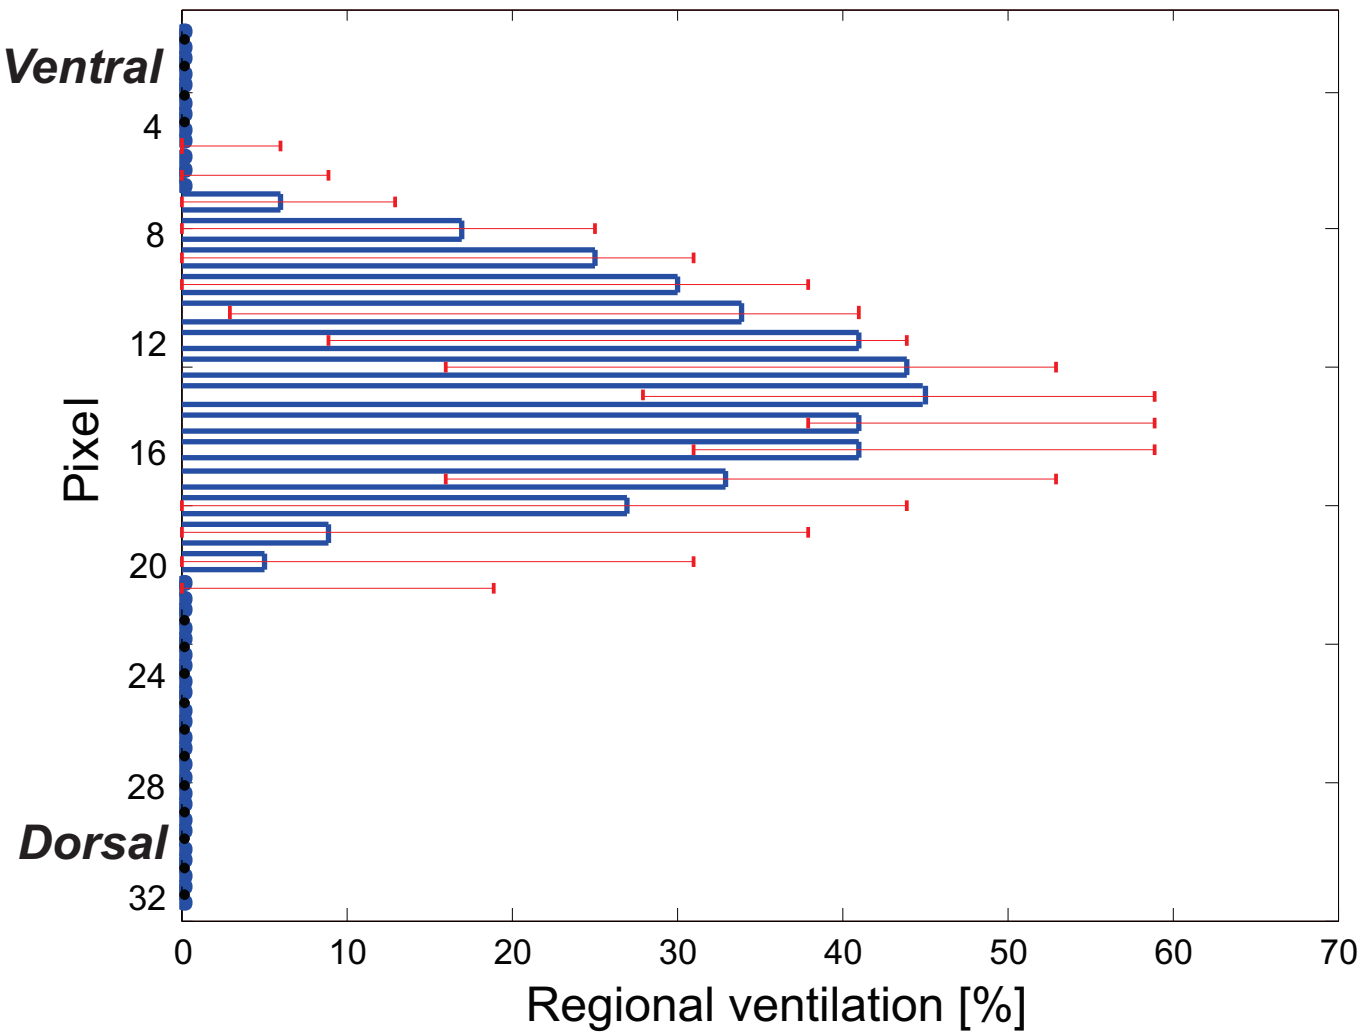

**4-hour ventilation**

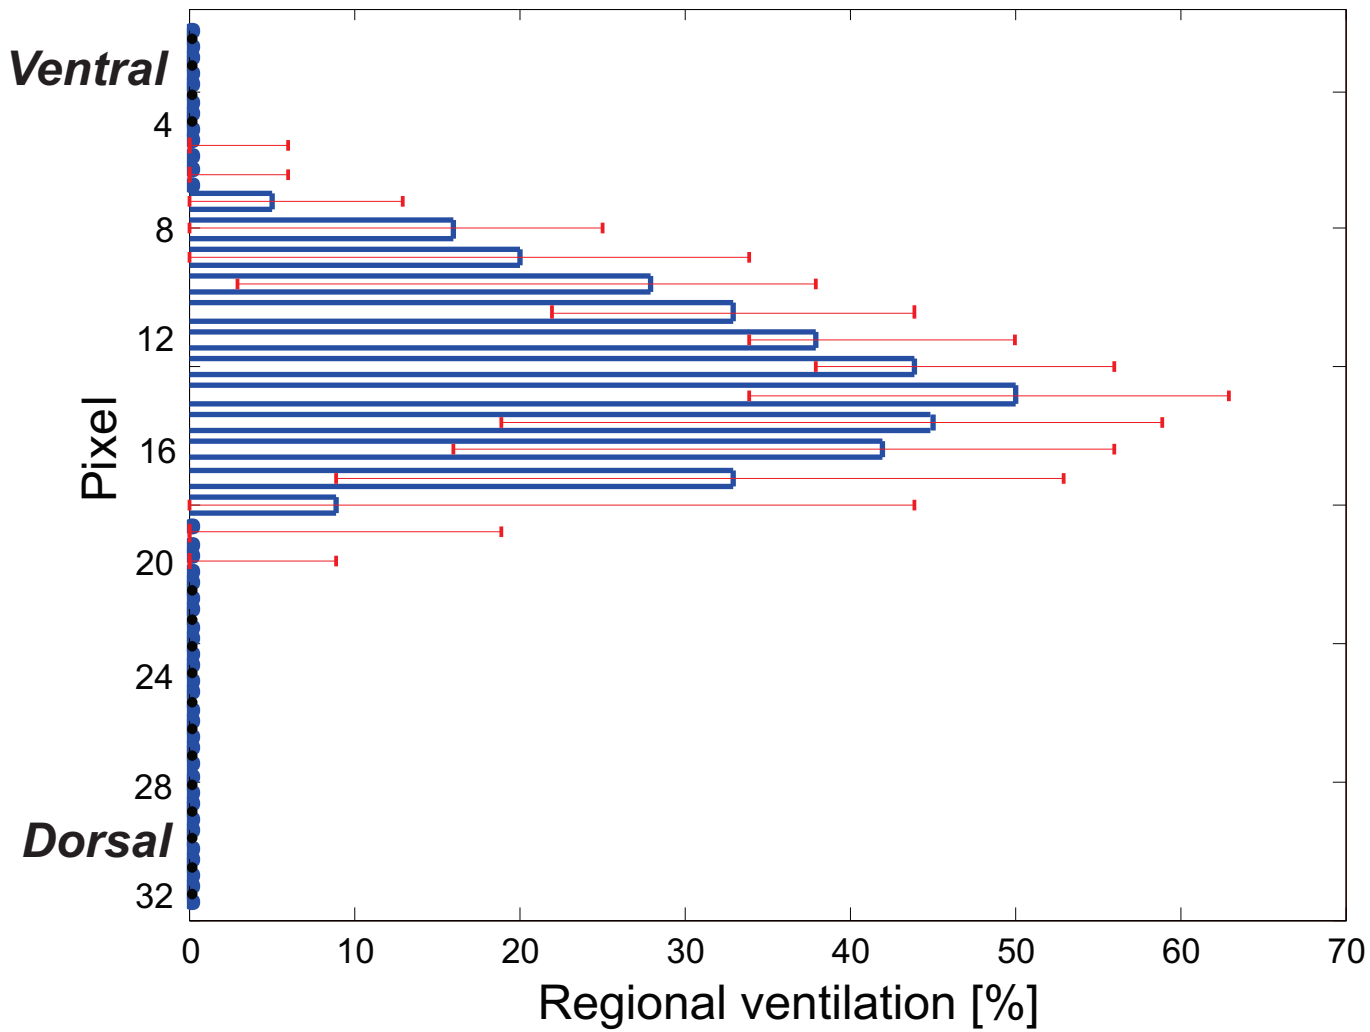

Supplement: MOESM8 [file 9714320]
